# Supplementary material for: Trametes versicolor Laccase-Based Magnetic Inorganic-Protein Hybrid Nanobiocatalyst for Efficient Decolorization of Dyes in the Presence of Inhibitors
Source: MDPI journal article supplement (doi:10.3390/ma17081790), 2024-04-13
Supplement: s1 [file s1]

---

Supplementary Materials

## ***Trametes versicolor* laccase-based magnetic inorganic-protein hybrid nanobiocatalyst for efficient decolorization of dyes in presence of inhibitors**

Sanjay K. S. Patel <sup>1,†</sup>, Rahul K. Gupta <sup>1,†</sup>, Karthikeyan K. Karuppanan <sup>1</sup>, Deepak K. Padhi <sup>1</sup>, Sampathkumar Ranganathan <sup>1</sup>, Parasuraman Paramanantham <sup>1</sup> and Jung-Kul Lee <sup>1,\*</sup>

Department of Chemical Engineering, Konkuk University, Seoul 05029, Republic of Korea; sanjaykspatel@gmail.com (S.K.S.P.); guptarahul9m@gmail.com (R.K.G.); karthikk1529@gmail.com (K.K.K.); dkpadhi7@gmail.com (D.K.P.); sampathbiotech@gmail.com (S.R.); parasupondiuni@gmail.com (P.P.)

\* Correspondence: jkrhee@konkuk.ac.kr

† These authors equally contributed to this work.

**Table S1.** Details of the partial purification of *Trametes versicolor* laccase.

| Purification step  | Volume (mL) | Total protein (mg) | Specific activity (U·mg total protein <sup>-1</sup> ) | Yield (%) | Fold purification |
|--------------------|-------------|--------------------|-------------------------------------------------------|-----------|-------------------|
| Crude              | 100         | 2.1                | 160                                                   | 100       | 1                 |
| 30 kD purification | 4.8         | 1.4                | 212                                                   | 66.6      | 1.5               |

**Table S2.** Activity of partially purified *Trametes versicolor* laccase in the presence of manganese ions.

| Metal ions concentration (mM) | Relative activity (%) |
|-------------------------------|-----------------------|
| 0                             | 100 ± 3.2             |
| 0.8                           | 108 ± 3.8             |
| 1.0                           | 112 ± 5.6             |
| 2.0                           | 127 ± 8.9             |
| 5.0                           | 103 ± 4.5             |

<sup>a</sup>Free *Trametes versicolor* activity of 212 U·mg total protein<sup>-1</sup> was considered 100%.

**Table S3.** Immobilization of *Tv*Lac as magnetic inorganic-protein hybrid nanobiocatalysts as NFs at different incubation.

| Incubation (h) | Encapsulation yield (%) | Relative activity (%) <sup>a</sup> |
|----------------|-------------------------|------------------------------------|
| 2              | 46.1 ± 3.4              | 160 ± 13.0                         |
| 6              | 72.9 ± 4.5              | 193 ± 15.2                         |
| 24             | 85.5 ± 3.6              | 245 ± 14.7                         |

<sup>a</sup>The free *Tv*Lac activity of 212 U mg of total protein<sup>-1</sup> was considered as 100%.

**Table S4.** The activity measurements of *Tv*Lac using various substrates.

| Substrate            | Absorbance | Molar extinction coefficient (ε <sub>max</sub> ·M <sup>-1</sup> ·cm <sup>-1</sup> ) | Relative activity (%) <sup>a</sup> |
|----------------------|------------|-------------------------------------------------------------------------------------|------------------------------------|
| ABTS                 | 420        | 36000                                                                               | 100 ± 4.3                          |
| 2,6-dimethoxy phenol | 470        | 35645                                                                               | 51.7 ± 3.7                         |
| Guaiacol             | 436        | 6400                                                                                | 39.2 ± 2.8                         |
| Pyrogallol           | 450        | 4400                                                                                | 16.8 ± 1.2                         |

<sup>a</sup>The activity was measured using 1.0 mM substrate under standard assay conditions. Free *Tv*Lac activity of 212 U mg of total protein<sup>-1</sup> was considered 100%.

**Table S5.** The decolorization of dyes by free and immobilized laccase as NFs.

| System                                                                                | Decolorization (%) |            |            |            |            |
|---------------------------------------------------------------------------------------|--------------------|------------|------------|------------|------------|
|                                                                                       | 6 h                | 12 h       | 24 h       | 48 h       | 72 h       |
| CBBR-250                                                                              |                    |            |            |            |            |
| Free <i>Tv</i> Lac                                                                    | 16.3 ± 1.2         | 27.6 ± 2.1 | 40.1 ± 2.6 | 44.2 ± 2.7 | 44.3 ± 2.7 |
| Mn- <i>Tv</i> Lac NFs                                                                 | 27.8 ± 1.8         | 53.9 ± 3.8 | 85.6 ± 3.7 | 89.2 ± 3.1 | 89.4 ± 3.2 |
| Fe <sub>3</sub> O <sub>4</sub> /Mn- <i>Tv</i> Lac NFs                                 | 27.5 ± 2.0         | 56.3 ± 4.2 | 89.5 ± 3.3 | 93.9 ± 1.9 | 94.3 ± 1.8 |
| Fe <sub>3</sub> O <sub>4</sub> nanoparticles                                          | 0.22 ± 0.1         | 0.22 ± 0.1 | 0.22 ± 0.1 | 0.22 ± 0.1 | 0.22 ± 0.1 |
| Fe <sub>3</sub> O <sub>4</sub> /Mn- <i>Tv</i> Lac NFs (heat-inactivated) <sup>a</sup> | 0.56 ± 0.1         | 0.58 ± 0.1 | 0.59 ± 0.1 | 0.61 ± 0.1 | 0.62 ± 0.1 |
| Xylene cyanol                                                                         |                    |            |            |            |            |
| Free <i>Tv</i> Lac                                                                    | 18.3 ± 1.4         | 31.8 ± 2.5 | 49.3 ± 2.9 | 52.7 ± 3.8 | 52.8 ± 3.9 |
| Mn- <i>Tv</i> Lac NFs                                                                 | 31.0 ± 2.3         | 58.6 ± 4.4 | 89.4 ± 3.2 | 93.3 ± 2.4 | 93.5 ± 2.3 |
| Fe <sub>3</sub> O <sub>4</sub> /Mn- <i>Tv</i> Lac NFs                                 | 30.4 ± 2.4         | 61.2 ± 4.7 | 92.7 ± 2.3 | 96.5 ± 1.6 | 96.9 ± 1.7 |
| Fe <sub>3</sub> O <sub>4</sub> nanoparticles                                          | 0.21 ± 0.1         | 0.22 ± 0.1 | 0.22 ± 0.1 | 0.22 ± 0.1 | 0.22 ± 0.1 |
| Fe <sub>3</sub> O <sub>4</sub> /Mn- <i>Tv</i> Lac NFs (heat-inactivated)              | 0.64 ± 0.1         | 0.67 ± 0.1 | 0.69 ± 0.1 | 0.70 ± 0.1 | 0.70 ± 0.1 |

<sup>a</sup>Heat-inactivation of the enzyme was done at 90 °C for 4 h.

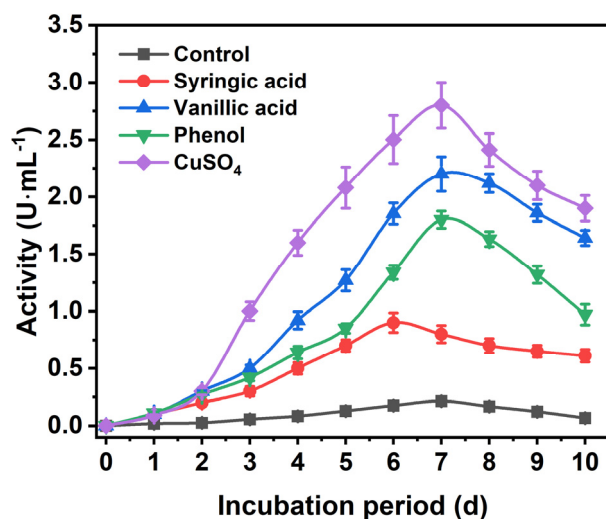

**Figure S1.** *Trametes versicolor* laccase production profile in the presence of different inducers (0.5 mM).

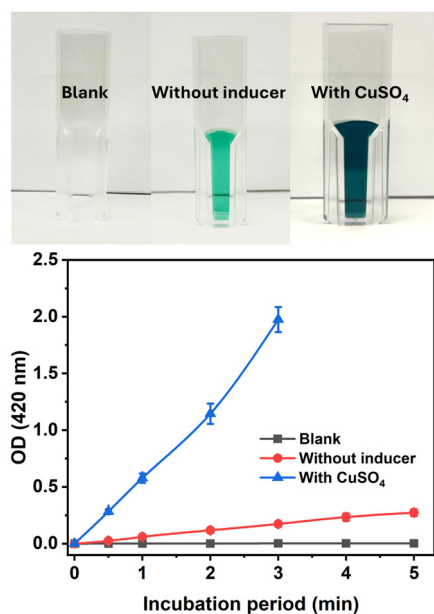

**Figure S2.** Activity measurements by the spectrophotometric procedure for produced laccase.

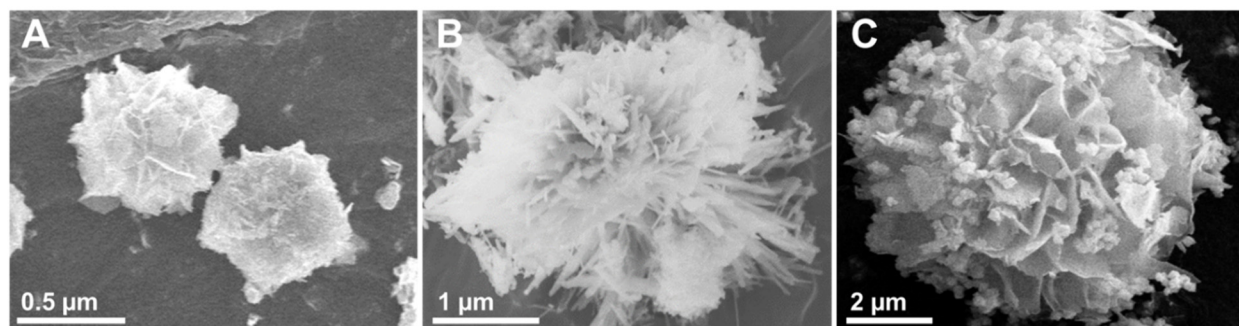

**Figure S3.** The field-emission scanning electron microscopy images of magnetic nanoflowers synthesized after 3 h (A), 12 h (B), and 24 h (C) incubation at 4°C.

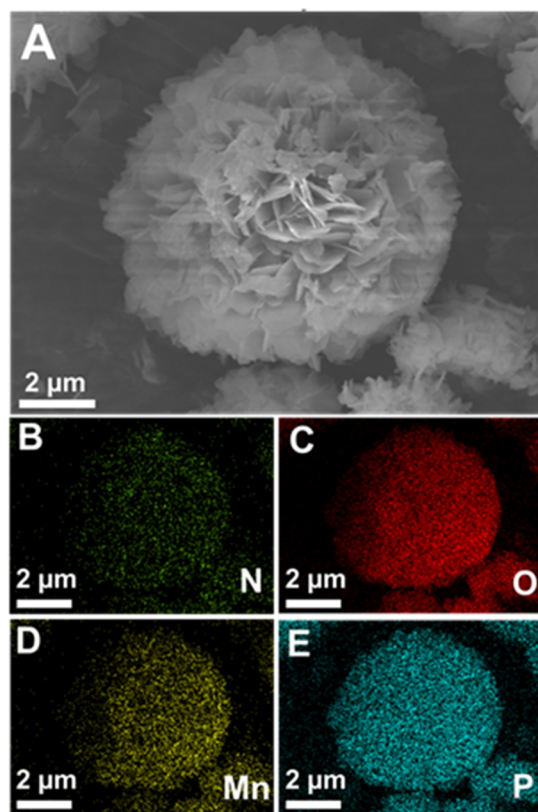

**Figure S4.** Field-emission scanning electron microscopy and elemental mapping analysis of  $\text{Mn}_3(\text{PO}_4)_2$ -laccase (Mn-*TvLac*) nanoflowers. (A) field-emission scanning electron micrograph of the inorganic-protein hybrids as Mn-*TvLac* nanoflowers, and (B-E) elemental mapping analysis for nitrogen (B), oxygen (C), manganese (D), and phosphorus (E).

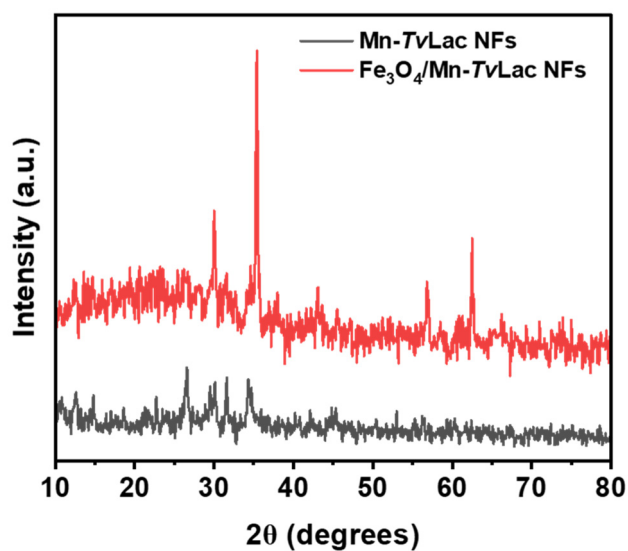

**Figure S5.** X-ray diffraction patterns of inorganic-protein hybrid nanoflowers (NFs). Mn-*TvLac* =  $\text{Mn}_3(\text{PO}_4)_2$ -laccase.

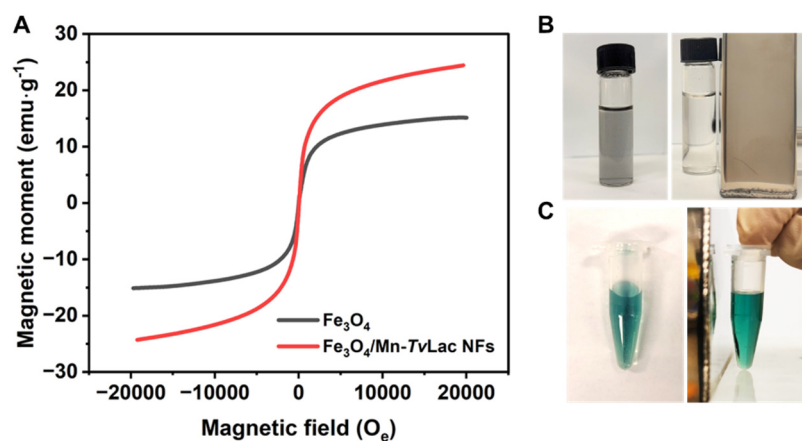

**Figure S6.** Magnetic property measurements of Fe<sub>3</sub>O<sub>4</sub> nanoparticles and Fe<sub>3</sub>O<sub>4</sub>/Mn-TvLac hybrids (A), recovery of magnetic NFs by applying an external magnetic field (B), and under recycling conditions (C).

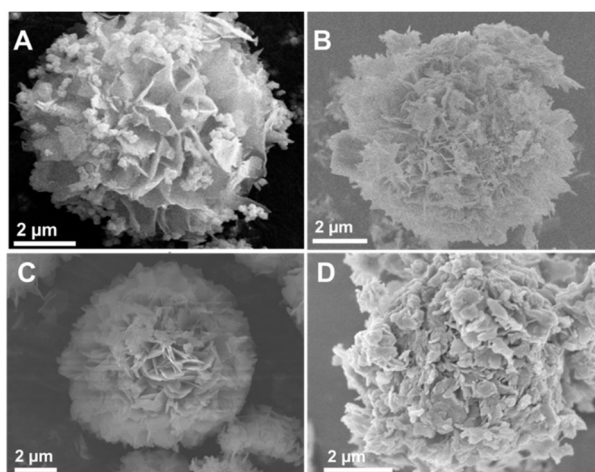

**Figure S7.** The field-emission scanning electron microscopy images of Fe<sub>3</sub>O<sub>4</sub>/Mn-TvLac (A and B) and Mn-TvLac NFs (C and D): before recycling (A and C) and after ten cycles of reusability (B and D).
